# Supplementary material
Source: publisher figshare collection journal article supplement (https://sage.figshare.com/ndownloader/files/14660933)
Supplement: Supplementary file 1 [file 14660933]

| Rites and religious symbols                                                         |                                                                                     | Heritage and traditions                                                               |                                                                                       | Cultural values of individualism/collectivism                                         |                                                                                       |
|-------------------------------------------------------------------------------------|-------------------------------------------------------------------------------------|---------------------------------------------------------------------------------------|---------------------------------------------------------------------------------------|---------------------------------------------------------------------------------------|---------------------------------------------------------------------------------------|
| French culture                                                                      | Moroccan culture                                                                    | French culture                                                                        | Moroccan culture                                                                      | French culture                                                                        | Moroccan culture                                                                      |
|     |    |    |    |    |    |
| Christmas Tree                                                                      | "Sacrifice Feast"                                                                   | French castle                                                                         | Riad                                                                                  | Lonesome individual                                                                   | United family                                                                         |
|    |    |    |    |    |    |
| Traditional "Yule log"                                                              | Ramadan                                                                             | Piercing                                                                              | Henna tattoo                                                                          | Individual autonomy                                                                   | Group conformity                                                                      |
|   |  |  |  |  |  |
| Church                                                                              | Mosque                                                                              | Electric guitar                                                                       | Oud guitar                                                                            | Competition                                                                           | Cooperation                                                                           |
|  |  |  |  |  |  |
| Christian cross                                                                     | Star and crescent moon                                                              | Four-leaf clover                                                                      | The Hamsa                                                                             | Isolated elderly person                                                               | Intergenerational relationships                                                       |
